# Supplementary material for: High-throughput sequence analysis reveals variation in the relative abundance of components of the bacterial and fungal microbiota in the rhizosphere of Ginkgo biloba
Source: PeerJ journal article supplement (doi:10.7717/peerj.8051), 2019-11-15
Supplement: Figure_S1.pdf [file Figure_S1.pdf]

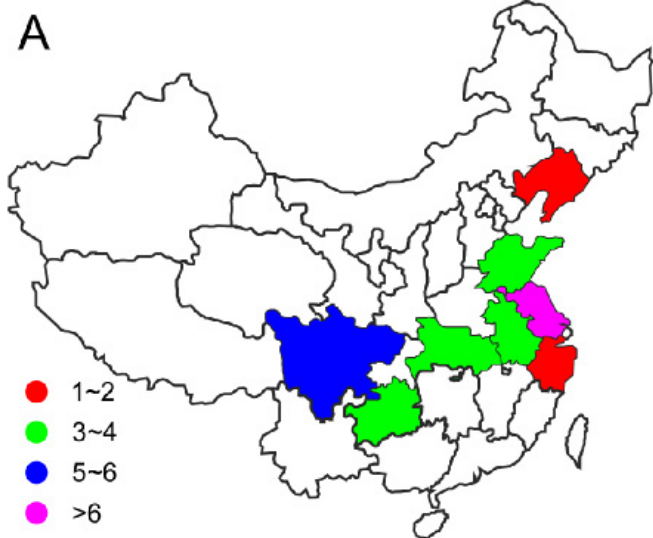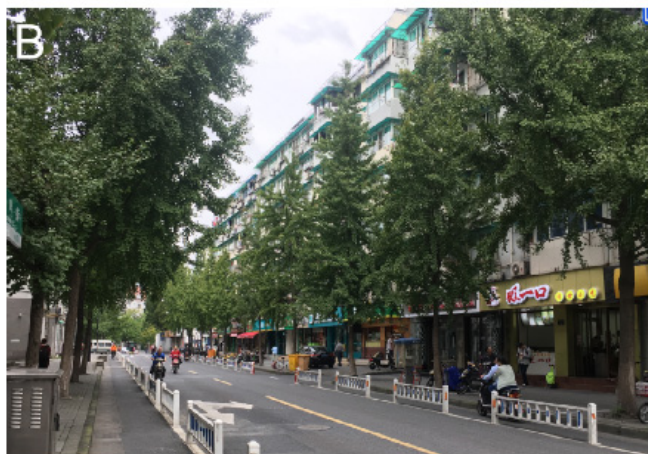

**Figure S1. Distribution of *Ginkgo biloba* in China.** (A) Number of cities in each province in China, where *G. biloba* is treated as a municipal tree. Data were obtained through website searches. (B) A common street in the city of Hangzhou. *Ginkgo* trees are planted along both sides of the street.
