# Supplementary material for: High-throughput sequence analysis reveals variation in the relative abundance of components of the bacterial and fungal microbiota in the rhizosphere of Ginkgo biloba
Source: PeerJ journal article supplement (doi:10.7717/peerj.8051), 2019-11-15
Supplement: Figure_S7.pdf [file Figure_S7.pdf]

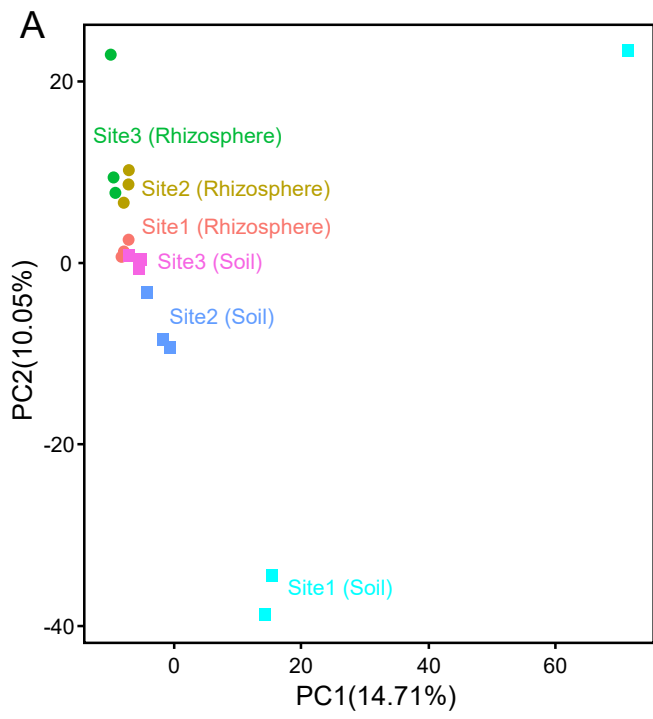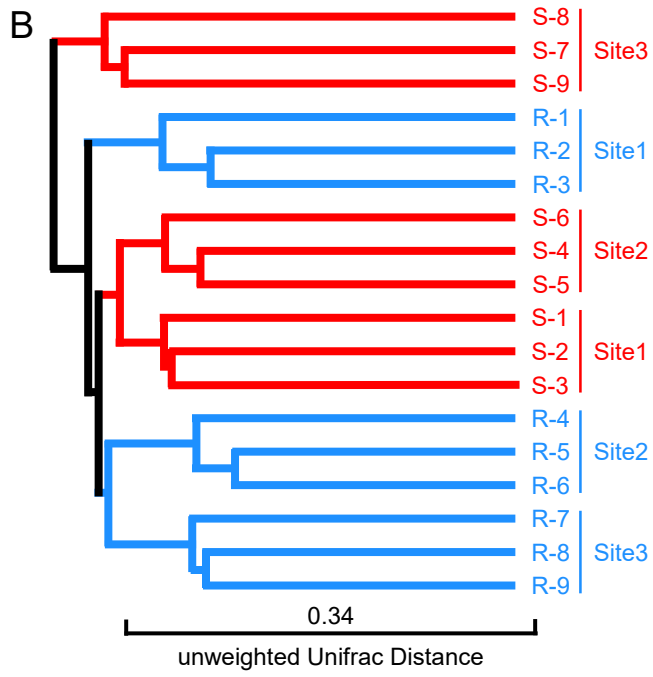

**Figure S7. Beta diversity of the fungal communities.**  
 (A) PCA analysis. Samples from the rhizosphere and the bulk soil are marked. (B) UPGMA cluster analysis. Samples collected from the rhizosphere are marked in blue, and samples collected from the bulk soil are marked in red.
